# Supplementary material for: Proteo-Transcriptomic Characterization of Sirex nitobei (Hymenoptera: Siricidae) Venom
Source: MDPI journal article supplement (doi:10.3390/toxins13080562), 2021-08-11
Supplement: s1 [file s1]

## Supplementary Materials: Proteo-Transcriptomic Characterization of *Sirex nitobei* (Hymenoptera: Siricidae) Venom

Chenglong Gao, Lili Ren, Ming Wang, Zhengtong Wang, Ningning Fu, Huiying Wang, Xiaochen Wang, Tegen Ao, Wensheng Du, Zijin Zheng, Huadong Li and Juan Shi

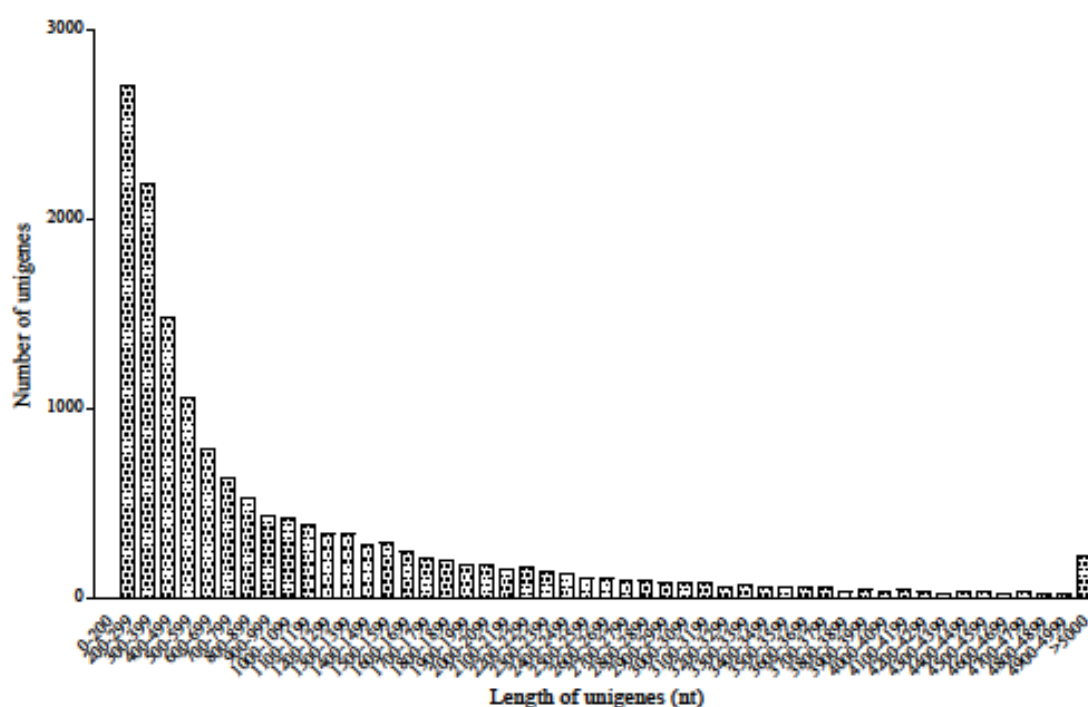

Figure S1. The unigene length distribution of the venom glands of *S. nitobei*.

**Table S5.** Primers used for qRT-PCR analysis of selected venom components.

| Primer                                                 | Sequence                                                     |
|--------------------------------------------------------|--------------------------------------------------------------|
| Laccase-2                                              | F: ATCCTGGCGATTGGTTGCTTCATT<br>R: TGGCGGTAATGCCGGTACGT       |
| Laccase-3                                              | F: GACGATTCACTGGCACGGCATT<br>R: GCGTTGGAGTGGTCTCATTGG        |
| Serine protease inhibitor Kazal-type 4-like            | F: GCACATCTCAGCATTCCTTCATTCCG<br>R: TCTCGTATCCTTGGCGGTTGGT   |
| Chitooligosaccharidolytic beta-N-acetylglucosaminidase | F: AGTGTAACCTTCGCCACCAAGAACAA<br>R: CCTCTACGGACGCTACCATTGCTA |
| Beta-galactosidase                                     | F: ACTGTATTGCGGTCCACTGTTAGC<br>R: AAGCCTGCGACACGAAGTATATGG   |
| Icarapin                                               | F: GTGCCATGAACAGACTCAGAGAACA<br>R: TCCGTCACATCCTAAGCAGTCAGAG |
| WAP four-disulfide core domain protein 2               | F: GAACAATCGCCAGTGCATCATCCT<br>R: TGTATCCACCATCGTCTCCGAAGTT  |
| Ejaculatory bulb-specific protein 3                    | F: TGACCTTCTCACTGCCTGCTCTC<br>R: CGAACGCCTGCTCAAGAACTATGT    |
| 60S ribosomal protein<br>(housekeeping gene)           | F: TTCGTGTACGGCGTTGTGTTCTT<br>R: TGTTGTACCTGGAGCCATGAGAGT    |

**Table S7.** Identification information of analysis by LC-MS/MS.

| Total Spectrum | Identified Spectrum | Peptide Number | Protein number |
|----------------|---------------------|----------------|----------------|
| 45842          | 11823               | 6762           | 1095           |

**Table S8.** One-way ANOVA of  $\Delta C_t$  values recorded in: females without venom glands, males and venom glands.

| Transcript                                             | F               | Significance |
|--------------------------------------------------------|-----------------|--------------|
| Laccase-2                                              | $F_{2,6}=156.7$ | $p < 0.0001$ |
| Serine protease inhibitor Kazal-type 4-like            | $F_{2,6}=30.34$ | $p < 0.001$  |
| Chitooligosaccharidolytic beta-N-acetylglucosaminidase | $F_{2,6}=53.63$ | $p < 0.001$  |
| Beta-galactosidase                                     | $F_{2,6}=352.3$ | $p < 0.0001$ |
| Icarapin                                               | $F_{2,6}=485.4$ | $p < 0.0001$ |
| WAP four-disulfide core domain protein 2               | $F_{2,6}=50.31$ | $p < 0.001$  |
| Ejaculatory bulb-specific protein 3                    | $F_{2,6}=584.7$ | $p < 0.0001$ |
